# Supplementary material for: Functional diversity in Dichomitus squalens monokaryons
Source: PubMed Central journal article supplement — IMA Fungus. 2017 Mar 8;8(1):17–25. doi: 10.5598/imafungus.2017.08.01.02 (PMC5493533; doi:10.5598/imafungus.2017.08.01.02), 2017-03-08
Supplement: SF1.pdf [file SF1.pdf]

**Supplementary Figure 1: Comparative growth profile of the *D. squalens* strains on 37 carbon sources**

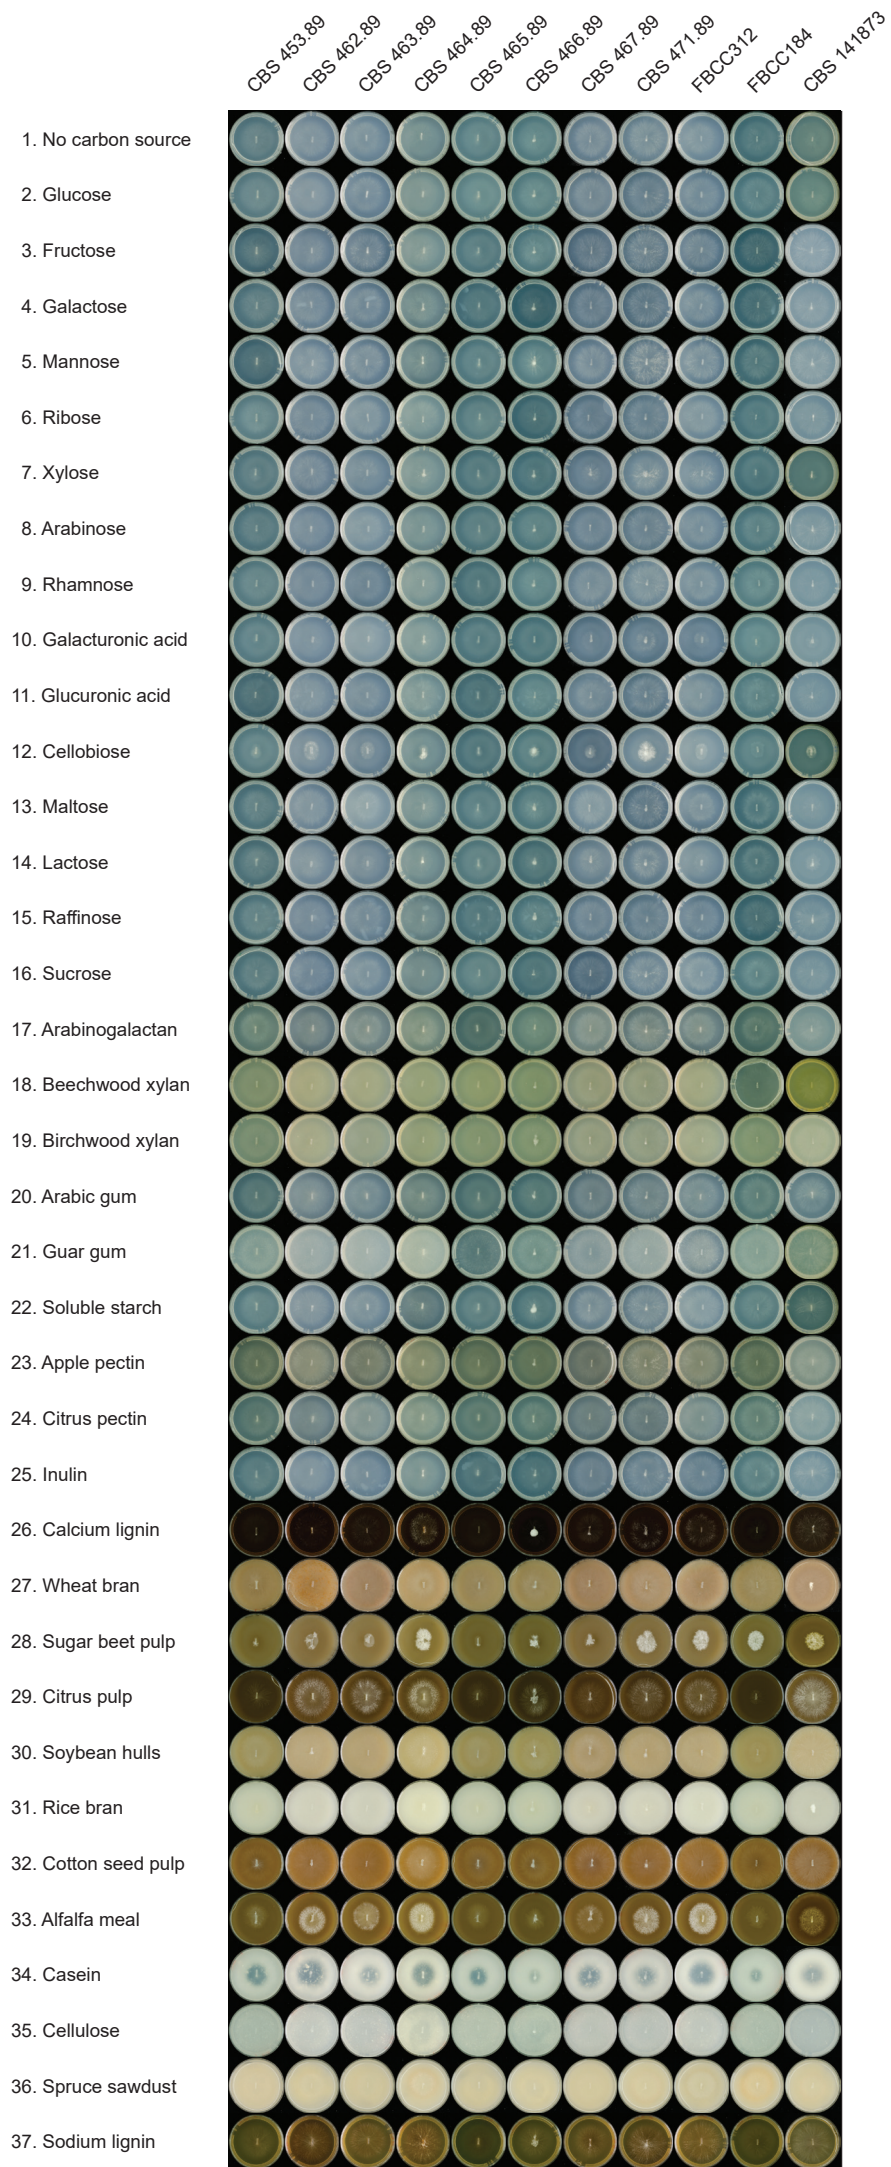

Supplementary Figure 1: Comparative growth profile of the *D. squalens* strains on 37 carbon sources.
